# Supplementary figures and images for: Internet Gaming Disorder in Children and Adolescents with Autism Spectrum Disorder and Attention Deficit Hyperactivity Disorder
Source: MDPI journal article supplement (doi:10.3390/brainsci14020154), 2024-02-02

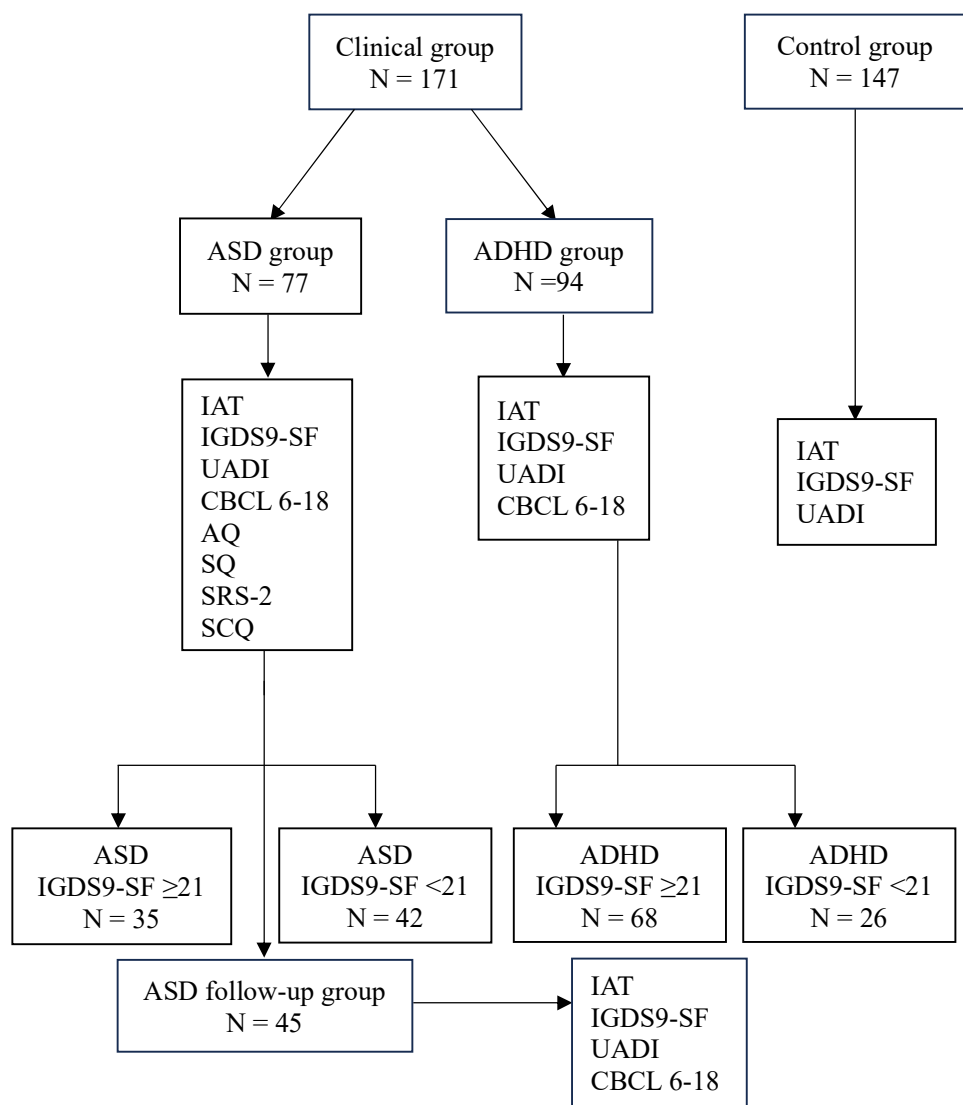

Supplement: s1 [file s1]
